# Supplementary material for: A Rb1 promoter variant with reduced activity contributes to osteosarcoma susceptibility in irradiated mice
Source: PubMed Central journal article supplement (PMC4237942; doi:10.1186/1476-4598-13-182), 2014-08-04
Supplement: 1476-4598-13-182-S1.pdf [file 1476-4598-13-182-S1.pdf]

| Gene Name                                             | Pos / Mbp     | OB Expression | PosMed Search | Funktion                                                                              |
|-------------------------------------------------------|---------------|---------------|---------------|---------------------------------------------------------------------------------------|
| <b>D14Mit90</b> 72.276                                |               |               |               |                                                                                       |
| <a href="#">Fndc3a</a>                                | 72.5 - 72.7 r | xx            | x             | fibronectin type III domain containing 3A                                             |
| <a href="#">Cysltr2</a>                               | 73.05 r       | x             | x             | cysteinyl leukotriene receptor 2                                                      |
| <a href="#">Rcbtb2</a>                                | 73.2 f        | xxx           |               | regulator of chromosome condensation (RCC1) and BTB (POZ) domain containing protein 2 |
| <a href="#">Rb1</a>                                   | 73.18 r       | xx            | xxx           | Retinoblastoma susceptibility                                                         |
| <a href="#">miRNA687(homol)</a>                       | 73.2          | o             |               | micro RNA                                                                             |
| <a href="#">Lpar6</a>                                 | 73.24 f       | xx            |               | lysophosphatidic acid receptor 6                                                      |
| <a href="#">Ltm2b</a>                                 | 73.36 r       | xxx           |               | integral membrane protein 2B                                                          |
| <a href="#">Med4</a>                                  | 73.5 f        | o             |               | mediator of RNA polymerase II transcription, subunit 4 homolog (yeast)                |
| <a href="#">Nudt15</a>                                | 73.5 r        | o             |               | nudix (nucleoside diphosphate linked moiety X)-type motif 15                          |
| <a href="#">Sucla2</a>                                | 73.5 f        | xx            |               | succinate-Coenzyme A ligase, ADP-forming, beta subunit                                |
| <a href="#">AC155246.1</a>                            | 73.6 f        | x             |               | unknown, protein coding                                                               |
| <a href="#">AC131029.1</a>                            | 73.7          | x             |               | snRNA                                                                                 |
| <a href="#">Gm6984</a>                                | 73.9 r        | o             |               | pseudogene                                                                            |
| <a href="#">Htr2a</a>                                 | 74.6 - 74.7 f | xxx           | x             | 5-hydroxytryptamine (serotonin) receptor 2A                                           |
| <a href="#">Esd</a>                                   | 73.7 f        | xxx           | x             | esterase D/formylglutathione hydrolase                                                |
| <a href="#">Lrch1</a>                                 | 74.7 - 74.9 r | xxx           |               | leucine-rich repeats and calponin homology (CH) domain containing 1                   |
| <b>D14Mit225</b> 74.930                               |               |               |               |                                                                                       |
| o: < 0.01<br>x: 0.01 - 0.1<br>xx: 0.1 - 1<br>xxx: > 1 |               |               |               |                                                                                       |

**Table S2:** List of annotated genes on mouse chromosome 14, 72 600 000 Mbp - 75 300 000 Mbp, their function, expression in osteoblasts and evidence for an association with osteosarcoma by PosMed-search.
