# Supplementary material for: A Rb1 promoter variant with reduced activity contributes to osteosarcoma susceptibility in irradiated mice
Source: PubMed Central journal article supplement (PMC4237942; doi:10.1186/1476-4598-13-182), 2014-08-04
Supplement: 1476-4598-13-182-S2.pdf [file 1476-4598-13-182-S2.pdf]

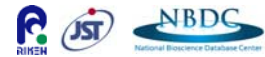

# PosMed Positional Medline

search  condition  species   
 Select Interval with OmicBrowse chromosome  position from  to  clear version   
 keyword    gene name  show

Mouse gene hits

Total Hits: 7 (1.084 sec)

  


- check all
1.  Rb1
  2.  Esd
  3.  Itm2b
  4.  Cysltr2
  5.  Lpar6
  6.  Htr2a
  7.  Fndc3a

 display mode: 
**1. [Rb1 , retinoblastoma 1](#) Score: 1.04E-50077**

|  | Name                        | No. of docs | P value  | Position                                |
|--|-----------------------------|-------------|----------|-----------------------------------------|
|  | Rb1                         | 4088 docs   |          | <a href="#">Mm:14:73595309-73725547</a> |
|  |                             | 18 docs     | 1.04E-77 |                                         |
|  | osteosarcoma susceptibility |             |          |                                         |

**2. [Esd , esterase D/formylglutathione h...](#) Score: 1.81E-50020**

|  | Name                        | No. of docs | P value  | Position                                |
|--|-----------------------------|-------------|----------|-----------------------------------------|
|  | Esd                         | 438 docs    |          | <a href="#">Mm:14:75132179-75149655</a> |
|  |                             | 2 docs      | 1.81E-20 |                                         |
|  | osteosarcoma susceptibility |             |          |                                         |

**3. [Itm2b , integral membrane protein 2B](#) Score: 1.81E-30020**

|  | Name                        | No. of docs | P value  | Position                                |
|--|-----------------------------|-------------|----------|-----------------------------------------|
|  | Itm2b                       | 84 docs     |          | <a href="#">Mm:14:73762219-73785096</a> |
|  |                             | 30 docs     | 5.35E-46 |                                         |
|  | Alzheimer disease           | 86841 docs  |          |                                         |
|  |                             | 2 docs      | 1.81E-20 |                                         |
|  | osteosarcoma susceptibility |             |          |                                         |

**4. [Cysltr2 , cysteinyl leukotriene receptor...](#) Score: 1.81E-30020**

|  | Name                        | No. of docs | P value  | Position                                |
|--|-----------------------------|-------------|----------|-----------------------------------------|
|  | Cysltr2                     | 164 docs    |          | <a href="#">Mm:14:73428935-73448879</a> |
|  |                             | 62 docs     | 2.12E-75 |                                         |
|  | Asthma                      | 132457 docs |          |                                         |
|  |                             | 1 doc       | 1.81E-20 |                                         |
|  | osteosarcoma susceptibility |             |          |                                         |

**5. [Lpar6 , lysophosphatidic acid receptor...](#) Score: 1.81E-30020**

|  | Name                        | No. of docs | P value  | Position                                |
|--|-----------------------------|-------------|----------|-----------------------------------------|
|  | Lpar6                       | 46 docs     |          | <a href="#">Mm:14:73637807-73639587</a> |
|  |                             | 11 docs     | 4.28E-25 |                                         |
|  | Mrgpra3                     | 10237 docs  |          | <a href="#">Mm:7:54844320-54856742</a>  |
|  |                             | 1 doc       | 1.81E-20 |                                         |
|  | osteosarcoma susceptibility |             |          |                                         |

**6. [Htr2a , 5-hydroxytryptamine \(serotonin...](#) Score: 1.81E-30020**

|  | Name                        | No. of docs | P value   | Position                                |
|--|-----------------------------|-------------|-----------|-----------------------------------------|
|  | Htr2a                       | 4171 docs   |           | <a href="#">Mm:14:75040647-75106666</a> |
|  |                             | 656 docs    | 1.43E-492 |                                         |
|  | Dopamine                    | 119859 docs |           |                                         |
|  |                             | 1 doc       | 1.81E-20  |                                         |
|  | osteosarcoma susceptibility |             |           |                                         |

**7. [Fndc3a , fibronectin type III domain co...](#) Score: 1.79E-30013**

|  | Name                        | No. of docs | P value  | Position                                |
|--|-----------------------------|-------------|----------|-----------------------------------------|
|  | Fndc3a                      | 29 docs     |          | <a href="#">Mm:14:72937753-73109810</a> |
|  |                             | 6 docs      | 1.79E-13 |                                         |
|  | Fn1                         | 30448 docs  |          | <a href="#">Mm:1:71632097-71699745</a>  |
|  |                             | 4 docs      | 9.31E-20 |                                         |
|  | osteosarcoma susceptibility |             |          |                                         |

1. Gonzalez-Vasconcellos I, Anastasov N, Sanli-Bonazzi B, Klymenko O, Atkinson MJ, Rosemann M: **Rb1 haploinsufficiency promotes telomere attrition and radiation-induced genomic instability.** *Cancer Res* 2013, **73**(14):4247-4255.
2. Collard TJ, Urban BC, Patsos HA, Hague A, Townsend PA, Paraskeva C, Williams AC: **The retinoblastoma protein (Rb) as an anti-apoptotic factor: expression of Rb is required for the anti-apoptotic function of BAG-1 protein in colorectal tumour cells.** *Cell Death Dis* 2012, **3**:e408.
3. Gonzalez-Vasconcellos I, Domke T, Kuosaite V, Esposito I, Sanli-Bonazzi B, Nathrath M, Atkinson MJ, Rosemann M: **Differential effects of genes of the Rb1 signalling pathway on osteosarcoma incidence and latency in alpha-particle irradiated mice.** *Radiat Environ Biophys* 2011, **50**(1):135-141.
4. Flowers S, Beck GR, Jr., Moran E: **Transcriptional activation by pRB and its coordination with SWI/SNF recruitment.** *Cancer Res* 2010, **70**(21):8282-8287.
5. Sabado Alvarez C: **Molecular biology of retinoblastoma.** *Clin Transl Oncol* 2008, **10**(7):389-394.
6. Wang A, Schneider-Broussard R, Kumar AP, MacLeod MC, Johnson DG: **Regulation of BRCA1 expression by the Rb-E2F pathway.** *J Biol Chem* 2000, **275**(6):4532-4536.
7. Smith E, Frenkel B, MacLachlan TK, Giordano A, Stein JL, Lian JB, Stein GS: **Post-proliferative cyclin E-associated kinase activity in differentiated osteoblasts: inhibition by proliferating osteoblasts and osteosarcoma cells.** *J Cell Biochem* 1997, **66**(2):141-152.
8. De Chiara A, T'Ang A, Triche TJ: **Expression of the retinoblastoma susceptibility gene in childhood rhabdomyosarcomas.** *J Natl Cancer Inst* 1993, **85**(2):152-157.
9. Hinds PW, Mittnacht S, Dulic V, Arnold A, Reed SI, Weinberg RA: **Regulation of retinoblastoma protein functions by ectopic expression of human cyclins.** *Cell* 1992, **70**(6):993-1006.
10. Wunder JS, Czitrom AA, Kandel R, Andrulis IL: **Analysis of alterations in the retinoblastoma gene and tumor grade in bone and soft-tissue sarcomas.** *J Natl Cancer Inst* 1991, **83**(3):194-200.
11. Templeton DJ, Park SH, Lanier L, Weinberg RA: **Nonfunctional mutants of the retinoblastoma protein are characterized by defects in phosphorylation, viral oncoprotein association, and nuclear tethering.** *Proc Natl Acad Sci U S A* 1991, **88**(8):3033-3037.
12. Hansen MF: **Molecular genetic considerations in osteosarcoma.** *Clin Orthop Relat Res* 1991(270):237-246.
13. Zhu XP, Dunn JM, Phillips RA, Goddard AD, Paton KE, Becker A, Gallie BL: **Preferential germline mutation of the paternal allele in retinoblastoma.** *Nature* 1989, **340**(6231):312-313.
14. Cavenee WK: **Chromosomal mechanisms in the initiation of human familial mixed cancers.** *Princess Takamatsu Symp* 1986, **17**:171-179.
