# Supplementary material for: A Rb1 promoter variant with reduced activity contributes to osteosarcoma susceptibility in irradiated mice
Source: PubMed Central journal article supplement (PMC4237942; doi:10.1186/1476-4598-13-182), 2014-08-04
Supplement: 1476-4598-13-182-S7.pdf [file 1476-4598-13-182-S7.pdf]

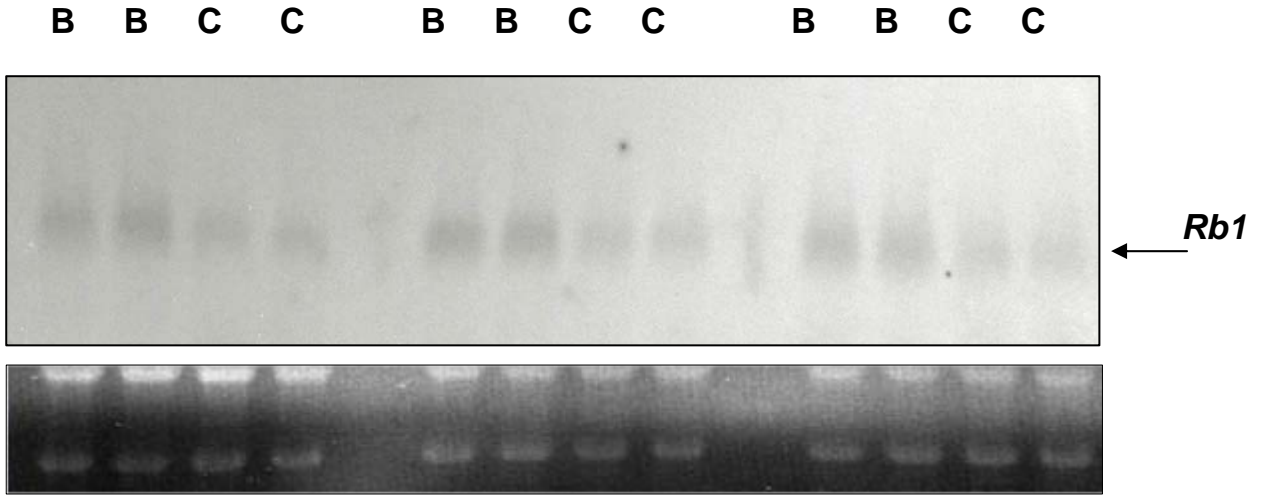

Suppl 5
