# Supplementary material for: A Rb1 promoter variant with reduced activity contributes to osteosarcoma susceptibility in irradiated mice
Source: PubMed Central journal article supplement (PMC4237942; doi:10.1186/1476-4598-13-182), 2014-08-04
Supplement: 1476-4598-13-182-S9.pdf [file 1476-4598-13-182-S9.pdf]

| Primer       | Sequence                    | PCR Conditions          |
|--------------|-----------------------------|-------------------------|
| mRb-flox-212 | GAAAGGAAAGTCAGGGACATTGGG    | Ta = 58 °C              |
| mRb-flox-18  | GGCGTGTGCCATCAATG           |                         |
| mCreCol_f    | CCTGGAAAATGCTTCTGTCCGTTTGCC | Ta = 62 °C              |
| mCreCol_r    | GAGTTGATAGCTGGCTGGTGGCAGATG |                         |
| mRb1_p6_F    | TCTGTGCGTGACTCGCCCATC       | Ta = 64 °C, +4%<br>DMSO |
| mRb1_p8.2_R  | GGAACGTCCCCCGAGGAAAA        |                         |
| mRb1-Ex17_F  | CAAAGTGGAAAGCCAACTTGA       | Ta = 60 °C (qRT-PCR)    |
| mRb1-Ex17_R  | CACTTACTGAAAGCCATGCAA       |                         |
| mRb1-Ex19_F  | TGAAATCTACCTCCCTTGCC        | Ta = 60 °C (qRT-PCR)    |
| mRb1-Ex19_R  | CTGGAGCCACAACCTAACCTAGT     |                         |
| Fndc3a F     | AGATGCCCACTCTACACACG        | Ta = 60 °C (qRT-PCR)    |
| Fndc3a R     | TTCCTTGGCGATCCTTTAAT        |                         |
| Cysltr2 F    | CCTGAATTTGGGAAAGGAAG        | Ta = 60 °C (qRT-PCR)    |
| Cysltr2 R    | TCACCATGGAGAGAAGCAAG        |                         |
| Rcbtb2 F     | TTCGTCAGGCTTGTGTCTTC        | Ta = 60 °C (qRT-PCR)    |
| Rcbtb2 R     | GTGCTCTGAATGTCGCCTAC        |                         |
| Rb1 F        | TCTCACCTCCTGCACTACTCA       | Ta = 60 °C (qRT-PCR)    |
| Rb1 R        | CGCTCCTGTTCTGACCTCTT        |                         |
| Lpar6 F      | GGTCCGACTTGGAAACAGTTT       | Ta = 60 °C (qRT-PCR)    |
| Lpar6 R      | GTCAAGGAAGCCAACCCATA        |                         |
| Ltm2b F      | TTGCTCTTCAGCCAGATGAT        | Ta = 60 °C (qRT-PCR)    |
| Ltm2b R      | GAAGGCTCGTTCAGGATGAC        |                         |
| Med4 F       | GCTGCAGAAACAGCTGAAAG        | Ta = 60 °C (qRT-PCR)    |
| Med4 R       | TTTCCTTTGCCTGGTAAACA        |                         |
| Nudt15 F     | ATTTGGAATTCGGTGAGACC        | Ta = 60 °C (qRT-PCR)    |
| Nudt15 R     | CAGCTTCTTCCCAGGTTTCT        |                         |
| Sucla2 F     | GTCTGTGAGCGCAAATATCC        | Ta = 60 °C (qRT-PCR)    |
| Sucla2 R     | GCAGCCACATCTTCAATGTT        |                         |
| AC155246.1 F | CTAAGGGGGAAACTCATATC        | Ta = 60 °C (qRT-PCR)    |
| AC155246.1 R | CTTGGGTGAATTTGCTTC          |                         |
| Gm6984 F     | TCTCGACCCTGAACGAATAA        | Ta = 60 °C (qRT-PCR)    |
| Gm6984 R     | ACTTCATGTTTCGCCTCCTTT       |                         |
| Htr2a F      | GAACCAAAGCCTTCCTGAAA        | Ta = 60 °C (qRT-PCR)    |
| Htr2a R      | AATCATCCTGTAGCCCGAAG        |                         |
| Esd F        | TCATAAATGCCAATTTCCCA        | Ta = 60 °C (qRT-PCR)    |
| Esd R        | ATTGGAGCAAATGCTGACAC        |                         |
| Lrch1 F      | AATTTGCAGATGTTGACCCA        | Ta = 60 °C (qRT-PCR)    |
| Lrch1 R      | CTTTGAGAGGCAGACCACAC        |                         |

**Supplement 9:** Primer sequences and PCR conditions for genomic and qRT-PCR
